# Supplementary material for: Comparing Adult Hippocampal Neurogenesis Across Species: Translating Time to Predict the Tempo in Humans
Source: Front Neurosci. 2018 Oct 5;12:706. doi: 10.3389/fnins.2018.00706 (PMC6182078; doi:10.3389/fnins.2018.00706)
Supplement: TABLE S2 — Predicted developmental time points between marmosets, and other species. [file Table_2.xlsx]

## Sheet: Sheet1
Event	Eventscale	Marmoset	Rat	Mouse	Macaque	Human
Trigeminal_ganglion_cell_generation_onset	0	54.57	9.97	8.57	27.72	33.74
Amacrine_generation_onset	0.0025	54.97	10.05	8.64	28.03	34.22
Horizontal_cell_generation_onset	0.0025	54.97	10.05	8.64	28.03	34.22
Purkinje_cell_generation_onset	0.0107	56.3	10.31	8.88	29.04	35.82
Cranial_motor_nuclei_peak	0.023	58.38	10.72	9.26	30.64	38.39
Locus_coeruleus_peak	0.023	58.38	10.72	9.26	30.64	38.39
Photoreceptor_generation_onset	0.0237	58.5	10.75	9.28	30.74	38.55
Trigeminal_motor_nucleus_peak	0.03	59.59	10.96	9.48	31.59	39.92
Medial_longitudinal_fasciculus_appears	0.0353	60.52	11.14	9.65	32.32	41.13
Inferior_olive_generation_onset	0.0366	60.76	11.19	9.69	32.52	41.45
Post-proliferative_zone_in_the_medulla_appears_(caudal_to_the_trigeminal_nerve)	0.0427	61.84	11.41	9.89	33.38	42.87
Mitral_cells_onset	0.046	62.45	11.53	10	33.86	43.67
Inferior_olivary_nucleus_peak	0.0523	63.63	11.76	10.22	34.82	45.26
Olfactory_tubercle_generation_onset	0.0523	63.63	11.76	10.22	34.82	45.26
Septal_nuclei_onset	0.0523	63.63	11.76	10.22	34.82	45.26
Locus_coeruleus_offset	0.0523	63.63	11.76	10.22	34.82	45.26
Superior_colliculus_generation_onset	0.0529	63.73	11.78	10.24	34.9	45.4
Retinal_ganglion_cell_generation_start	0.0529	63.74	11.79	10.24	34.91	45.41
Ganglionic_eminence_post-proliferative_zone_appears	0.0571	64.53	11.94	10.39	35.55	46.49
Cajal-retzius_cells_in_layer_I_are_born_(VC)	0.0597	65.02	12.04	10.48	35.95	47.17
Magnocellular_basal_forebrain_peak	0.0597	65.02	12.04	10.48	35.95	47.17
Entorhinal_cortex_neurogenesis_onset	0.0649	66.02	12.24	10.66	36.77	48.56
Medial_geniculate_nucleus_onset	0.0649	66.02	12.24	10.66	36.77	48.56
Superficial_SC_laminae_start	0.066	66.23	12.28	10.7	36.95	48.87
Post-proliferative_zone_appears_in_the_tegmentum	0.066	66.23	12.28	10.7	36.95	48.87
Cranial_sensory_nuclei_peak	0.0665	66.33	12.3	10.72	37.04	49.01
Post-proliferative/white_matter_appears_in_the_hypothalamus	0.0678	66.57	12.35	10.77	37.24	49.35
Granule_cell_layer_fascia_dentata_neurogenesis_onset	0.0765	68.31	12.7	11.09	38.68	51.84
Hippocampal_CA3_neurogenesis_onset	0.0765	68.31	12.7	11.09	38.68	51.84
Hippocampal_CA1_neurogenesis_onset	0.0765	68.31	12.7	11.09	38.68	51.84
Subicular_cortex_neurogenesis_onset	0.0765	68.31	12.7	11.09	38.68	51.84
dLGN_start	0.0781	68.62	12.76	11.15	38.95	52.29
Inferior_olive_generation_offset	0.0791	68.82	12.8	11.18	39.12	52.59
Reticular_nuclei_peak	0.0791	68.82	12.8	11.18	39.12	52.59
Medial_geniculate_nucleus_peak	0.0791	68.82	12.8	11.18	39.12	52.59
Cortical_plate_first_observed/visible,_first_cortical_plate_neurons_born	0.0795	68.9	12.82	11.2	39.19	52.71
Caudoputamen_generation_onset	0.0795	68.9	12.82	11.2	39.19	52.71
Post-proliferative_zone_appears_in_the_bulging_thalamus	0.0796	68.92	12.82	11.2	39.2	52.73
Post-proliferative_zone_appears_in_the_pre-tectum	0.0796	68.92	12.82	11.2	39.2	52.73
Post-proliferative_zone_appears_in_the_cerebellum	0.0796	68.92	12.82	11.2	39.2	52.73
Post-proliferative_zone_appears_in_the_medial_pallium	0.0834	69.7	12.98	11.35	39.86	53.87
Purkinje_cells_peak	0.0838	69.78	12.99	11.36	39.93	53.99
Gaba_cells_appear_intermediate_zone_of_the_cortex	0.0848	69.99	13.04	11.4	40.11	54.31
GABA_positive_cells_appear_in_lower_intermediate_zone	0.0848	69.99	13.04	11.4	40.11	54.31
Deep_cerebellar_nuclei_peak	0.0848	69.99	13.04	11.4	40.11	54.31
Preoptic_nucleus_peak	0.0856	70.14	13.07	11.43	40.24	54.54
Granule_cells_in_the_dentate_gyrus_onset	0.0873	70.51	13.14	11.5	40.55	55.08
Globus_pallidus_peak	0.0907	71.21	13.28	11.63	41.15	56.13
Neocortical_layer_1_emerges	0.0967	72.47	13.53	11.87	42.23	58.04
Raphe_complex_peak	0.097	72.54	13.55	11.88	42.3	58.16
Anterior_olfactory_nucleus_peak	0.097	72.54	13.55	11.88	42.3	58.16
vLGN_peak	0.0973	72.61	13.56	11.89	42.35	58.26
Post-proliferative_zone_appears_in_the_superior_colliculus	0.098	72.74	13.59	11.92	42.47	58.47
dLGN_peak	0.1037	73.97	13.84	12.15	43.54	60.37
Cochlear_nuclei_peak	0.1037	73.97	13.84	12.15	43.54	60.37
Anteroventral_cochlear_nucleus_peak	0.1037	73.97	13.84	12.15	43.54	60.37
Mitral_cells_peak	0.1037	73.97	13.84	12.15	43.54	60.37
Medial_forebrain_bundle_appears	0.104	74.04	13.85	12.16	43.59	60.47
Calretinin_neurons_first_observed_in_cortical_plate_	0.1081	74.93	14.03	12.33	44.38	61.88
Mammillo-thalamic_tract_appears	0.1081	74.93	14.03	12.33	44.38	61.88
Stria_medullaris_thalami_appears	0.1081	74.93	14.03	12.33	44.38	61.88
Fasciculus_retroflexus_appears	0.1088	75.1	14.07	12.37	44.53	62.15
Trigeminal_ganglion_cell_generation_offset	0.1092	75.18	14.08	12.38	44.59	62.26
VP_and_VB_nuclei_peak	0.1097	75.3	14.11	12.4	44.7	62.46
Nucleus_of_lateral_olfactory_tract_peak	0.1097	75.3	14.11	12.4	44.7	62.46
Axons_in_optic_stalk	0.1128	75.99	14.25	12.53	45.31	63.56
GABA_cells_in_subplate_start	0.1145	76.36	14.32	12.6	45.64	64.15
Amygdala_peak	0.1145	76.36	14.32	12.6	45.64	64.15
Purkinje_cell_generation_offset	0.1145	76.36	14.32	12.6	45.64	64.15
Horizontal_cell_generation_offset	0.115	76.47	14.34	12.63	45.74	64.33
Medial_geniculate_nucleus_offset	0.1156	76.61	14.37	12.65	45.86	64.54
Suprachisamatic_nucleus_peak	0.1156	76.61	14.37	12.65	45.86	64.54
Septal_nuclei_peak	0.1156	76.61	14.37	12.65	45.86	64.54
Entorhinal_cortex_peak	0.1156	76.61	14.37	12.65	45.86	64.54
GABA_cells_in_subplate_end	0.1231	78.31	14.72	12.98	47.38	67.32
GABAir_cells_in_lower_intermediate_zone/subventricular_border_(no_synapses)	0.1246	78.66	14.79	13.04	47.69	67.9
dLGN_end	0.1257	78.92	14.84	13.09	47.92	68.32
Optic_axons_at_chiasm_of_optic_tract	0.1264	79.08	14.87	13.12	48.07	68.58
Superior_colliculus_peak	0.1264	79.08	14.87	13.12	48.07	68.58
Internal_capsule_appears	0.1297	79.85	15.03	13.27	48.77	69.87
Rapid_axon_generation_in_optic_nerve_start	0.1297	79.85	15.03	13.27	48.77	69.87
Substantia_nigra_peak	0.1297	79.85	15.03	13.27	48.77	69.87
Subplate_and_intermediate_zone_apoptosis_onset	0.1297	79.85	15.03	13.27	48.77	69.87
Olfactory_tubercle_generation_peak	0.132	80.39	15.14	13.37	49.26	70.78
Lhx6_first_in_cortex_in_GABAergic_cells	0.132	80.39	15.14	13.37	49.26	70.78
AV,_AM,_AD_nuclei	0.132	80.39	15.14	13.37	49.26	70.78
Stria_terminalis_appears	0.1343	80.94	15.25	13.48	49.76	71.7
Rod_generation_onset	0.1365	81.46	15.35	13.58	50.24	72.59
Retinal_ganglion_cells_peak	0.1365	81.46	15.35	13.58	50.24	72.59
Subiculum_peak	0.1365	81.46	15.35	13.58	50.24	72.59
GABA_cells_in_the_subplate_appears	0.1374	81.68	15.4	13.62	50.44	72.96
Caudoputamen_peak	0.1374	81.68	15.4	13.62	50.44	72.96
Fornix_appears	0.1374	81.68	15.4	13.62	50.44	72.96
Amydgala_neurogenesis_ends	0.14	82.3	15.52	13.74	51	74.02
Pontine_nuclei_peak	0.1422	82.82	15.63	13.84	51.48	74.92
Parasubiculum_peak	0.1422	82.82	15.63	13.84	51.48	74.92
Optic_axons_reach_dLGN_and_SC	0.1478	84.2	15.91	14.1	52.76	77.34
NPY_expression_in_temporal_cortex-onset	0.15	84.74	16.02	14.21	53.26	78.27
Inferior_colliculus_peak	0.15	84.74	16.02	14.21	53.26	78.27
Dentate_gyrus_peak	0.15	84.74	16.02	14.21	53.26	78.27
Anterior_commisure_appears	0.1556	86.16	16.31	14.48	54.59	80.8
Retinal_amacrine_cells_peak	0.1578	86.72	16.43	14.59	55.12	81.81
LGN_axons_in_subplate	0.1616	87.69	16.62	14.78	56.04	83.57
Superficial_SC_laminae_end	0.1616	87.69	16.62	14.78	56.04	83.57
Superior_colliculus_generation_offset	0.1674	89.17	16.93	15.06	57.45	86.3
Hippocampal_commisure_appears	0.1674	89.17	16.93	15.06	57.45	86.3
Calretinin_appears_in_the_VZ/SVZ_of_the_VC	0.169	89.6	17.01	15.15	57.86	87.09
Presubiculum_peak	0.169	89.6	17.01	15.15	57.86	87.09
Dopaminergic_axons_from_the_midbrain_reach_the_subplate	0.169	89.6	17.01	15.15	57.86	87.09
Mitral_cells_offset	0.1722	90.46	17.19	15.32	58.68	88.69
CA_1,_CA_2_peak	0.1763	91.55	17.41	15.53	59.74	90.75
Septal_nuclei_offset	0.177	91.73	17.45	15.56	59.91	91.08
Tufted_cells_peak	0.177	91.73	17.45	15.56	59.91	91.08
Subicular_cortex_neurogenesis_offset	0.1848	93.86	17.89	15.98	61.98	95.17
Onset_of_retinal_waves_stage_1	0.1849	93.9	17.9	15.99	62.02	95.25
Entorhinal_cortex_neurogenesis_offset	0.1859	94.17	17.95	16.04	62.29	95.78
Calbindin_appears_in_the_GE	0.1869	94.44	18.01	16.09	62.56	96.31
Cortical_plate_apoptosis_onset	0.1869	94.44	18.01	16.09	62.56	96.31
Nucleus_accumbens_peak	0.1944	96.54	18.44	16.5	64.63	100.44
Cortical_axons_reach_the_thalamus	0.1985	97.71	18.68	16.73	65.79	102.77
Corpus_callosum_appears	0.1993	97.93	18.73	16.78	66.01	103.21
Hippocampal_CA3_neurogenesis_offset	0.2034	99.14	18.97	17.02	67.22	105.66
Hippocampal_CA1_neurogenesis_offset	0.2034	99.14	18.97	17.02	67.22	105.66
NPY_expression_in_frontal_cortex-onset	0.2039	99.27	19	17.04	67.35	105.93
NPY_extends_in_VC	0.2039	99.27	19	17.04	67.35	105.93
Dopaminergic_axons_from_the_midbrain_reach_the_cortical_plate	0.2039	99.27	19	17.04	67.35	105.93
Dopaminergic_axons_from_the_midbrain_are_found_throughout_the_cerebral_cortex	0.2039	99.27	19	17.04	67.35	105.93
Retinal_ganglion_cell_generation_end	0.2118	101.61	19.49	17.5	69.73	110.77
Cortical_axons_reach_dorsal_lateral_geniculate_nucleus_(dLGN)	0.212	101.67	19.5	17.52	69.79	110.88
Optic_nerve_axon_number_peak	0.212	101.67	19.5	17.52	69.79	110.88
Muller_cell_generation_onset	0.22	104.07	19.99	17.99	72.24	115.94
Bipolar_cell_generation_start	0.22	104.07	19.99	17.99	72.24	115.94
GAP43mRNA_cytoarchitectural_variation_in_S1_onset_(lower_layer_III)	0.2282	106.6	20.52	18.5	74.87	121.4
End_of_retinal_waves_stage_1	0.2282	106.6	20.52	18.5	74.87	121.4
Rpl7_expression_begins_to_decline_in_the_isocortex	0.2353	108.85	20.99	18.95	77.22	126.34
Initial_differentiation_of_layer_V_(S1)	0.2357	108.98	21.01	18.97	77.36	126.63
Rods_peak	0.2361	109.12	21.04	19	77.51	126.93
Cortical_axons_innervate_dLGN	0.2427	111.23	21.48	19.42	79.75	131.68
Cytoarchitetural_variation_(layer_IV)_emerges_in_S1	0.2439	111.62	21.56	19.5	80.16	132.56
Cytarchitectural_variation_across_V1_(layer_IV_emerges)	0.2439	111.62	21.56	19.5	80.16	132.56
GABA_in_the_VZ_and_SVZ_of_the_cortex_is_no_longer_observed	0.2452	112.05	21.65	19.59	80.62	133.55
Onset_of_decrease_in_fractional_anisotropy	0.2506	113.86	22.03	19.95	82.56	137.7
Amacrine_cell_generation_offset	0.2569	115.99	22.47	20.38	84.86	142.65
Caudatoputamen_offset	0.2569	115.99	22.47	20.38	84.86	142.65
Surface_righting_onset	0.2614	117.52	22.79	20.69	86.53	146.28
Range_of_rapid_synaptogenesis_(VC)_start	0.2706	120.72	23.47	21.34	90.05	154
Onset_of_barrels_(S1)	0.2785	123.56	24.06	21.92	93.2	160.99
Onset_of_sublayers_in_layer_V_(S1)	0.2785	123.56	24.06	21.92	93.2	160.99
Onset_of_trilaminar_plate_(S1)	0.2785	123.56	24.06	21.92	93.2	160.99
Superficial_SC_start_of_lamination	0.2836	125.45	24.46	22.3	95.32	165.72
Visual_cortex_(VC)_projections_are_confined_to_straum_opticum	0.29	127.8	24.95	22.79	97.99	171.72
LGN_axons_in_cortical_layer_IV	0.29	127.8	24.95	22.79	97.99	171.72
Peak_number_of_anterior_commissure_axons	0.29	127.8	24.95	22.79	97.99	171.72
Rod_generation_offset	0.2915	128.39	25.08	22.9	98.66	173.22
SEMA5A_starts_to_be_expressed_in_the_primary_visual_cortex	0.2994	131.39	25.71	23.52	102.1	181.06
Peak_number_of_corpus_callosum_axons	0.3023	132.5	25.94	23.75	103.39	184
GABAergic_cells_become_visible_in_the_granular_layer_of_the_cerebellum	0.3023	132.5	25.94	23.75	103.39	184
Onset_of_barrel_field_septa_(S1)	0.304	133.17	26.08	23.89	104.15	185.76
Muller_cell_generation_offset	0.3083	134.85	26.44	24.23	106.11	190.27
Hnrpa1_expression_starts_to_decline_in_the_isocortex	0.3255	141.86	27.92	25.69	114.4	209.64
NADPH_expression_extends_to_upper_layers_of_the_CP_(frontal_cortex)	0.3255	141.86	27.92	25.69	114.4	209.64
Parvalbumin_appears_anywhere_in_CP_	0.3255	141.86	27.92	25.69	114.4	209.64
Ipsi/contra_segregation_in_LGN	0.3274	142.64	28.09	25.85	115.34	211.86
Ipsi/contra_segregation_in_SC	0.3274	142.64	28.09	25.85	115.34	211.86
Medial_lemniscus_myelination_onset	0.3275	142.66	28.09	25.86	115.36	211.9
Visual_cortical_axons_in_SC	0.3311	144.19	28.42	26.18	117.2	216.27
Corticospinal_projections_reach_lumbar_levels	0.3331	145.03	28.6	26.35	118.21	218.67
Lateral_lemniscus_myelination_onset	0.3332	145.07	28.6	26.36	118.26	218.79
Rapid_axon_loss_in_optic_nerve_ends	0.3365	146.52	28.91	26.66	120.02	223
Optic_tract_myelination_onset	0.3386	147.39	29.1	26.84	121.08	225.54
Middle_cerebellar_peduncle_myelination_onset	0.3408	148.34	29.3	27.04	122.25	228.34
Inferior_cerebellar_peduncle_myelination_onset	0.3408	148.34	29.3	27.04	122.25	228.34
VC_axons_is_faint_in_superficial_layers_of_the_superior_colliculus_(SC)	0.3419	148.84	29.41	27.15	122.85	229.81
Parvalbumin_expression_in_retrosplenial_cortex_begins	0.3419	148.84	29.41	27.15	122.85	229.81
Internal_capsule_myelination_onset	0.3441	149.79	29.61	27.35	124.02	232.61
External_capsule_myelination_onset	0.3472	151.16	29.9	27.64	125.71	236.71
Superior_cerebellar_peduncle_myelination_onset	0.3516	153.13	30.32	28.05	128.15	242.65
Cingulum_myelination_onset	0.3543	154.37	30.59	28.31	129.69	246.42
Stria_medullaris_myelination_onset	0.3543	154.37	30.59	28.31	129.69	246.42
Optic_radiation_myelination_onset	0.3575	155.8	30.89	28.61	131.47	250.78
Auditory_radiation_myelination_onset	0.3575	155.8	30.89	28.61	131.47	250.78
Olfactory_tract_myelination_onset	0.3592	156.6	31.07	28.78	132.48	253.26
Fasciculus_retroflexus_myelination_onset	0.3598	156.85	31.12	28.83	132.78	254.02
Parvalbumin_appears_in_the_cortical_plate-parietal_cortex	0.3622	157.95	31.35	29.07	134.17	257.45
Preyer_reflex	0.3623	158	31.36	29.08	134.24	257.6
Parvalbumin_expression_in_restrosplenial_cortex_extends_to_layers_II	0.3674	160.42	31.88	29.59	137.29	265.19
Parvalbumin_expression_in_retrosplanial_cortex_extends_to_layer_VI	0.3674	160.42	31.88	29.59	137.29	265.19
Parvalbumin_appears_in_layer_V_of_the_cortex_(VC)	0.3698	161.53	32.12	29.83	138.71	268.72
Parvalbumin_appears_in_the_cortical_plate-VC	0.3698	161.53	32.12	29.83	138.71	268.72
Anterior_commisure_myelination_onset	0.3744	163.74	32.59	30.3	141.54	275.79
Fornix_myelination_onset	0.3744	163.74	32.59	30.3	141.54	275.79
DCX/Prox1_reach_50_percent_of_granule_cells	0.3762	164.6	32.78	30.48	142.64	278.58
Lateral_Geniculate_Nucleus_Myelination_Onset	0.3771	165.03	32.87	30.57	143.19	279.95
Brachium_inferior_colliculus_myelination_onset	0.3819	167.38	33.38	31.07	146.23	287.64
Vibrissa_placing_adult_like_pattern	0.3842	168.5	33.62	31.31	147.68	291.32
Postconception_walking_onset	0.3879	170.36	34.02	31.71	150.11	297.51
Eye_opening	0.3883	170.53	34.05	31.74	150.33	298.08
Corpus_callosum_myelination_onset	0.3888	170.8	34.11	31.8	150.69	298.99
Hippocampus_myelination_onset	0.3914	172.09	34.39	32.08	152.38	303.31
Mammillothalamic_tract_myelination_onset	0.3914	172.09	34.39	32.08	152.38	303.31
Lamp2_expression_peaks_in_the_isocortex	0.3955	174.22	34.85	32.53	155.17	310.51
Vamp1_mRNA_onset_in_VC	0.396	174.44	34.9	32.58	155.47	311.27
NEFH_expression_onset_in_lower_layers_of_VC	0.396	174.44	34.9	32.58	155.47	311.27
Myelin_basic_protein_RNA_extends_to_lower_cortical_layers_in_VC	0.396	174.44	34.9	32.58	155.47	311.27
Calbindin_mRNA_extends_to_upper_layers_(VC)	0.396	174.44	34.9	32.58	155.47	311.27
Calbindin_mRNA_extends_to_top_of_upper_layer_in_frontal_cortex_(medial_frontal_cortex)	0.396	174.44	34.9	32.58	155.47	311.27
Striatum_myelination_onset	0.3968	174.83	34.98	32.67	155.99	312.61
Splenium_myelination_onset	0.4005	176.78	35.4	33.09	158.58	319.31
Lenticular_fasciculus_myelination_onset	0.4005	176.78	35.4	33.09	158.58	319.31
DCX/Prox1_reach_40_percent_of_granule_cells	0.4033	178.22	35.71	33.39	160.49	324.28
Platueau_of_RNA_seq_expression_in_the_hippocampus	0.4059	179.59	36.01	33.69	162.33	329.07
Parvalbumin_appears_in_layers_II-III_cortex_(VC)_	0.4091	181.27	36.37	34.05	164.59	335
Parvalbumin_extends_towards_the_top_of_layer_II_boundary_(VC)_	0.4091	181.27	36.37	34.05	164.59	335
Semi-adult_like_sleep_cycle	0.413	183.36	36.82	34.5	167.41	342.42
Range_of_rapid_synaptogenesis_(VC)_end	0.4172	185.64	37.32	35	170.51	350.6
Calbindin/Prox1_reach_50_percent_of_granule_cells	0.419	186.65	37.54	35.22	171.89	354.27
Plasticity/OD_critical_period_start	0.4475	202.93	41.08	38.77	194.59	415.67
Ki67/totalgranular_cells_in_the_dentage_gyrus_declines_to_2%	0.5075	241.94	49.66	47.46	252.6	581.78
SEMA5A_expression_declines_in_the_primary_visual_cortex	0.509	243.05	49.9	47.71	254.31	586.87
Visual_cortex_peak_synaptic_density_(area_17)	0.5167	248.62	51.13	48.97	263.01	612.86
Plasticity/OD_critical_period_end	0.5365	263.49	54.44	52.35	286.68	684.85
Corpus_callosum_myelination_offset	0.5842	303.02	63.29	61.47	352.76	894.68
DCX/totalgranular_cells_in_the_dentage_gyrus_declines_to_3%	0.645	362.3	76.74	75.49	459.84	1259
Middle_cerebellar_peduncle_myelination_end	0.6567	374.93	79.63	78.52	483.83	1344.28
Ki67/totalgranular_cells_in_the_dentate_gyrus_declines_to_0.7%	0.6606	379.26	80.62	79.57	492.14	1374.1
DCX/totalgranular_cells_in_the_dentate_gyrus_declines_to_2.5%	0.6752	395.86	84.43	83.58	524.43	1491.35
DCX/totalgranular_cells_in_the_dentate_gyrus_declines_to_2%	0.7123	441.35	94.94	94.72	616.28	1836.11
Ki67/totalgranular_cells_in_the_dentate_gyrus_declines_to_0.5%	0.7153	445.32	95.86	95.7	624.52	1867.82
DCX/totalgranularcells_in_the_dentate_gyrus_declines_to_1.5%	0.7645	514.38	111.98	112.95	773.48	2460.65
Ki67/totalgranular_cells_in_the_dentate_gyrus_declines_to_0.3%	0.8014	573.22	125.85	127.93	908.31	3026.77
DCX/totalgranularcells_in_the_dentate_gyrus_declines_to_1%	0.833	629.05	139.12	142.35	1042.62	3615.4
Ki67/total_granule_cells_in_the_dentate_gyrus_declines_to_0.2%	0.8732	707.82	157.99	163.03	1242.07	4530.22
DCX/totalgranularcells_in_the_dentate_gyrus_declines_to_0.5%	0.9545	898.44	204.32	214.45	1769.31	7147.06
Ki67/totalgranular_cells_in_the_dentate_gyrus_declines_to_0.1%	1	1026.81	235.96	250.04	2157.05	9226.14
